# Supplementary material for: A robust and reproducible procedure for cross-linking thermoset polymers using molecular simulation
Source: Royal Society of Chemistry journal article supplement (doi:10.1039/c5sm02788h), 2016-01-01
Supplement: c5sm02788h1.pdf [file c5sm02788h1.pdf]

# Electronic Supplementary Information for: A robust and reproducible procedure for cross-linking thermoset polymers using molecular simulation

Baris Demir<sup>a</sup> and Tiffany R. Walsh<sup>\*a</sup>

<sup>a</sup> Institute for Frontier Materials, Deakin University, Geelong, 3216, VIC, Australia; tiffany.walsh@deakin.edu.au

## Contents

**Methodological Details:** Details of partial-charge generation process and the pure liquid EPON and DETDA simulations.

**Table S1:** Atomic parameters used in our partial charge calculations.

**Table S2:** Ideal bond lengths and bond force-constants used in our multi-step cross-linking relaxation protocol.

**Table S3:** Calculated partial atomic charges for EPON and DETDA.

**Figure S1:** Product of the reaction between four EPON molecules and the secondary amine of DETDA.

**Figure S2:** Labels for unique atomic environments for DETDA and EPON molecules.

**Figure S3:** Reference sites on EPON and DETDA used for calculation of radial distribution functions.

**Figure S4:** Illustration of the yield strength and strain calculated using the convention of the 0.2% offset line.

**Figure S5:** Densities of pure liquids for EPON and DETDA.

**Figure S6:** Densities of the liquid precursor mixture of EPON and DETDA.

**Figure S7:** Evolution of the structure of the liquid precursor mixture of EPON and DETDA.

**Figure S8:** Bond lengths and bond angles associated with cross-linked bonds in the EPON-DETDA epoxy polymer samples.

**Figure S9:** Calculated pressure of the sample after the cross-linking process.

**Figure S10:** Young's Modulus plot.

**Figure S11:** Yield strength and yield strain calculated via the 0.2% offset line.

---

## Methodological Details

### Partial Atomic Charge Calculation

First, we generated a structure for each of the two monomers, EPON-862 and DETDA, in isolation. Note that for EPON-862 we model the ‘activated’ form of the structure, following Li and Strachan<sup>1</sup>. The activation of EPON-862 was captured by breaking the epoxide bonds (C-O) at both ends of the molecule, with subsequent hydrogenation of these exposed atomic sites. Herein, we denoted the activated form of EPON-862 merely as EPON. These two initial molecular structures (EPON and DETDA) were built from scratch using the freely-available Avogadro<sup>2</sup> software package, and then subjected to geometry optimization using the generalised Amber FF (GAFF)<sup>3</sup> (chosen because of its availability in Avogadro). The convergence criterion at this step was met when the potential energy difference between two successive steps dropped to below  $10^{-8}$  kJ mol<sup>-1</sup>. Structures of these two molecules are provided in Figure 2 of the main text. The resulting molecular structures of the EPON and DETDA molecules were used to calculate the atomic partial charges, as outlined below.

### Unreacted molecules

For the calculation of the partial atomic charges of the unreacted molecules, we tested two procedures: calculation of charges for a single (effectively isolated) molecule *in vacuo*, and, calculation of charges for a molecule in the condensed phase. Note that both sets of conditions involved 3-D periodic boundary conditions in the calculation of the charges. In the former case, the single geometry-optimised molecule (either EPON or DETDA) was placed in the centre of a cubic simulation cell of dimensions  $200 \times 200 \times 200$  Å<sup>3</sup>. In the latter case, by the term ‘condensed phase’, we refer to a system that contains 16 EPON and 8 DETDA molecules placed in a simulation cell with dimensions  $40 \times 40 \times 40$  Å<sup>3</sup>. We used the PACKMOL software package<sup>4</sup> to randomly place these geometry-optimized molecules in the cell prior to the charge calculation. For the QEq calculation, the partial charges were calculated to a tolerance of  $10^{-6}$ , with taper radius high and low values of 10.0 and 0.0 Å respectively, using the “*fix qeq/rea*” command in LAMMPS. For each element (C, H, O, N) we specified values of the atomic electronegativity ( $\chi$ , eV), the self-Coulomb potential ( $\eta$ , eV) and the valence orbital exponent ( $\gamma$ , dimensionless). These parameters for our epoxy system were taken from Refs.<sup>5-8</sup>. These values are provided in Table S1 of the ESI<sup>†</sup>.

For the calculation of the partial atomic charges in each case, we averaged the partial charges for each unique type of atomic environment. The labelling system that illustrates each unique atomic environment is provided in Figure S1 of the ESI<sup>†</sup>. In the case of the ‘condensed phase’ calculation, we first averaged over all unique sites in each molecule, and then averaged these over all instances of the same molecule type (either EPON or DETDA).

### Reacted molecules

Since the chemical environment of the atoms in the immediate (and possibly more distant) vicinity of the cross-link bond changes after the cross-link bond is formed, the partial atomic charge distribution for the reacted EPON/DETDAs molecule may be different to their counterparts for the unreacted molecules. To account for this, the partial atomic charges after cross-linking were also calculated. The EPON molecules were bonded with one DETDA molecule by cross-linking them manually using Avogadro<sup>2</sup>. For the primary amine reaction, one DETDA molecule was reacted with two EPON molecules (see Figure 3 in the main text), one located on each nitrogen site of the DETDA. For the secondary amine reaction, we bonded four

---

EPON molecules to a single DETDA molecule (see Figure S2 in the ESI<sup>†</sup>). In each case (primary and secondary amine reaction) the resulting structure was geometry-optimised following the same optimisation procedure as described above for the individual EPON and DETDA molecules.

Partial atomic charges were calculated over the reacted EPON/DETDAs model as described above for the individual molecules. Based on our results for the unreacted molecules, we chose to use the ‘isolated’ *in vacuo* configuration, again placing the molecule in the centre of a 200×200×200 Å<sup>3</sup> periodic cubic cell. The same settings for the charge equilibration calculation were used as described above. Again, we averaged the atomic partial charges over all unique atomic environments, following the same labelling scheme as shown in Figure S1 in the ESI<sup>†</sup>.

## vdW Potentials for Pure Liquid Simulations

vdW interactions can be captured using different analytical forms; *e.g.* Lennard-Jones (LJ) and Buckingham (X6) potentials. Equations 1 and 2 show the LJ and X6 potentials, respectively. The main difference between LJ and X6 potentials is found in the repulsive term. To investigate the performance of these two forms, we conducted MD simulations on our pure liquid samples using both forms of the vdW interaction.

$$E_{LJ} = 4\epsilon \left[ \left( \frac{\sigma}{r} \right)^{12} - \left( \frac{\sigma}{r} \right)^6 \right] \quad (1)$$

$$E_{Buckingham} = \left[ A \exp\left(\frac{-r}{\rho}\right) - \frac{B}{r^6} \right] \quad (2)$$

In Equations 1 and 2,  $\sigma$  is the inter-atomic distance at which the LJ potential between a given atom pair is zero and  $r$  is the distance between the atom pair.  $\epsilon$  is the minimum energy as a function of atom pair separation, which is also called the well depth.  $A$ ,  $B$ , and  $\rho$  are constants of the Buckingham potential. The  $A$  and  $B$  parameters are a function of  $\xi$ , which is a dimensionless scaling parameter. There are two options for the implementation of the Buckingham potential, based on the value of the  $\xi$  parameter: 1)  $\xi = 12$  (denoted here as  $X6_{const}$ ) for all atoms, and 2)  $\xi = 12$  to 14.444 (denoted here as  $X6_{var}$ )<sup>9</sup>, depending on the atom type. In the case of  $X6_{var}$ , each different atom has a different  $\xi$  value within the range stated above. These were H: 12.382, C: 14.034, N: 13.843 and O: 13.483.

---

**Table S1:** Atomic parameters, electronegativity ( $\chi$ , eV), the self-Coulomb potential ( $\eta$ , eV) and the valence orbital exponent ( $\gamma$ , dimensionless), used in our QEq partial charge calculations.

| <b>Element</b> | $\chi$ | $\eta$  | $\gamma$ |
|----------------|--------|---------|----------|
| C              | 5.7254 | 13.8470 | 0.8712   |
| H              | 3.8446 | 20.1678 | 0.8910   |
| O              | 8.5000 | 14.2824 | 0.8712   |
| N              | 6.7768 | 13.6070 | 1.0512   |

---

**Table S2:** Ideal bond-lengths ( $\text{\AA}$ ) and bond force constants ( $\text{kcal mol}^{-1} \text{\AA}^{-1}$ ) for the C–N cross-link bond, as a function of the relaxation protocol used in our cross-linking procedure.

| <b>Relaxation Step</b> | <b>Force constant</b> | <b>Ideal bond length</b> |
|------------------------|-----------------------|--------------------------|
| step 1                 | 1                     | 3                        |
| step 2                 | 10                    | 2.75                     |
| step 3                 | 50                    | 2.5                      |
| step 4                 | 100                   | 2.25                     |
| step 5                 | 200                   | 2                        |
| step 6                 | 250                   | 1.75                     |
| step 7                 | 300                   | 1.5                      |
| step 8                 | 350                   | 1.462                    |

---

**Table S3:** Partial atomic charges calculated using the ‘vacuum’ (isolated) systems, for both EPON and DETDA. The labels refer to those shown in Figure S1 of the ESI.

| <u>Atom type</u> | <u>Charge (esu)</u> |
|------------------|---------------------|
| C1               | -0.1429             |
| C2               | -0.0307             |
| C3               | 0.2454              |
| C4               | -0.0728             |
| C5               | -0.3161             |
| C6               | -0.1832             |
| C7               | -0.3306             |
| C8               | -0.3576             |
| C9               | 0.1388              |
| C10              | -0.0400             |
| C11              | 0.2704              |
| C12              | -0.1339             |
| C13              | 0.0439              |
| C14              | -0.2600             |
| H1               | 0.1133              |
| H2               | 0.2734              |
| H3               | 0.1087              |
| H4               | 0.1342              |
| H5               | 0.3573              |
| H6               | 0.1208              |
| O1               | -0.5994             |
| O2               | -0.5168             |
| N1               | -0.7496             |

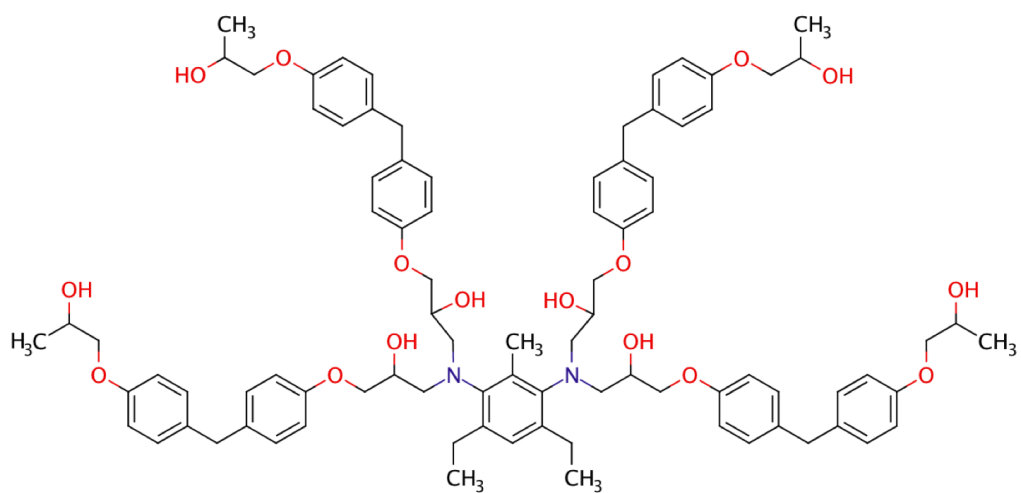

**Figure S1:** Product of the reaction between four EPON molecules and the secondary amine of the DETDA molecule.

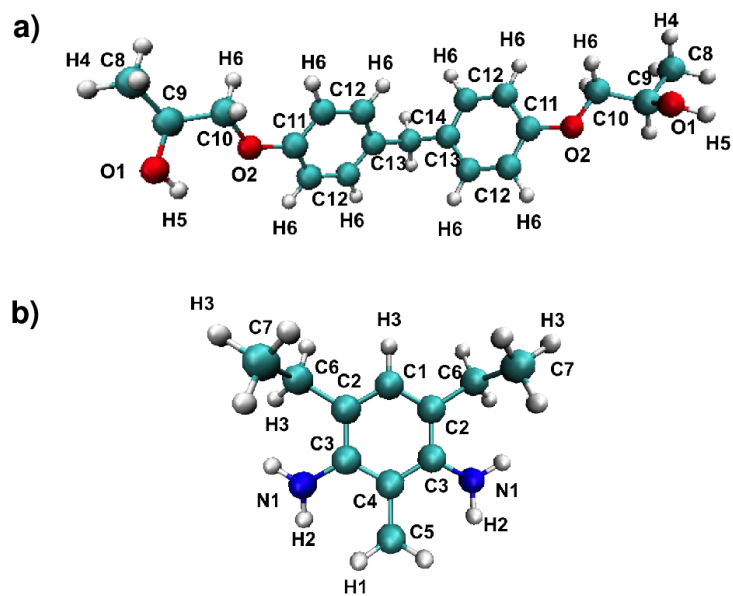

**Figure S2:** Labels for unique atomic environments in a) the EPON molecule and b) the DETDA molecule.



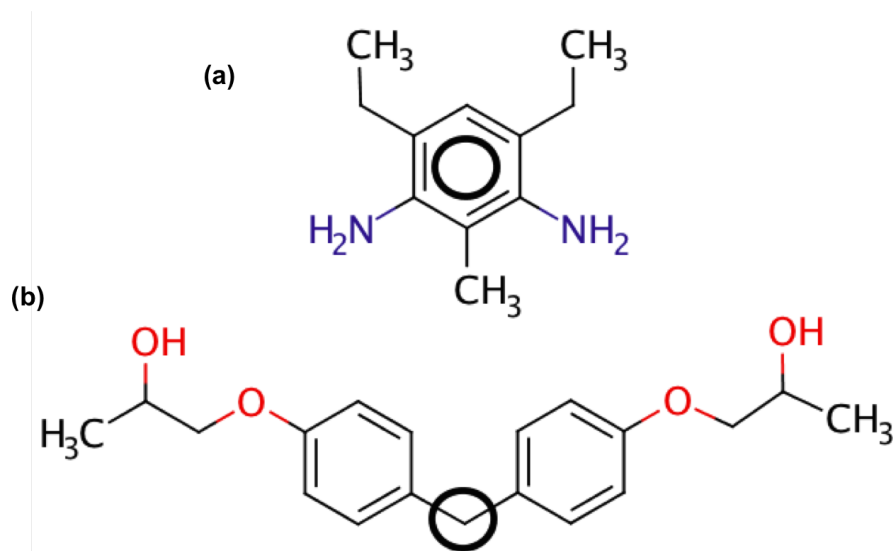

**Figure S3:** Reference sites on EPON and DETDA used for calculation of radial distribution functions (RDFs).

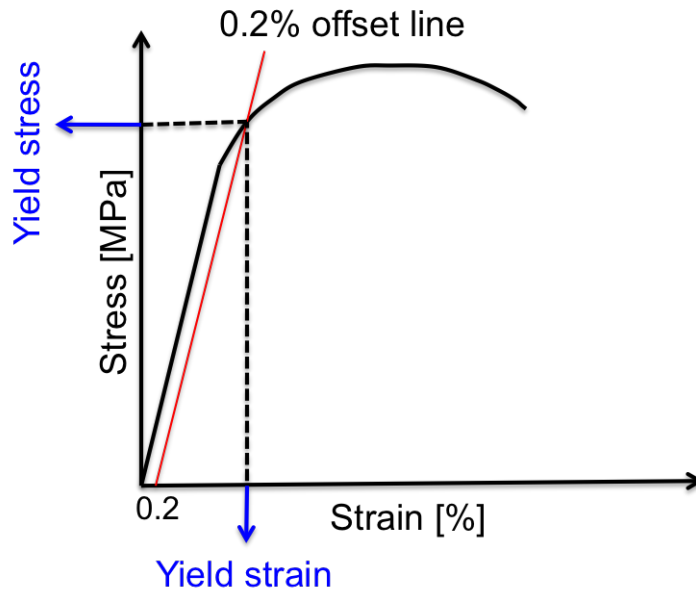

**Figure S4:** Illustration of the yield strength and strain calculated using the convention of the 0.2% offset line.

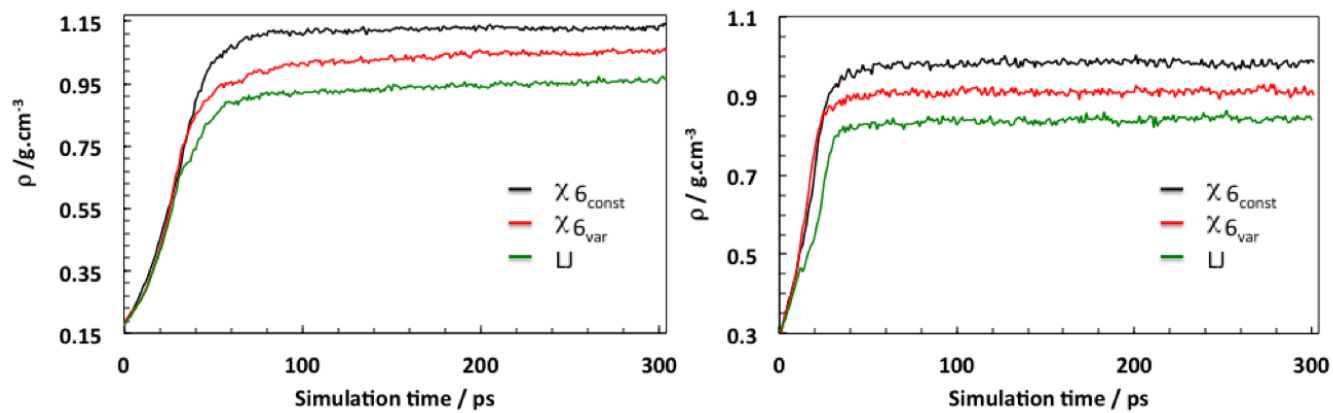

**Figure S5:** Density of (a) pure EPON and (b) pure DETDA, at 300 K and 1 atm.

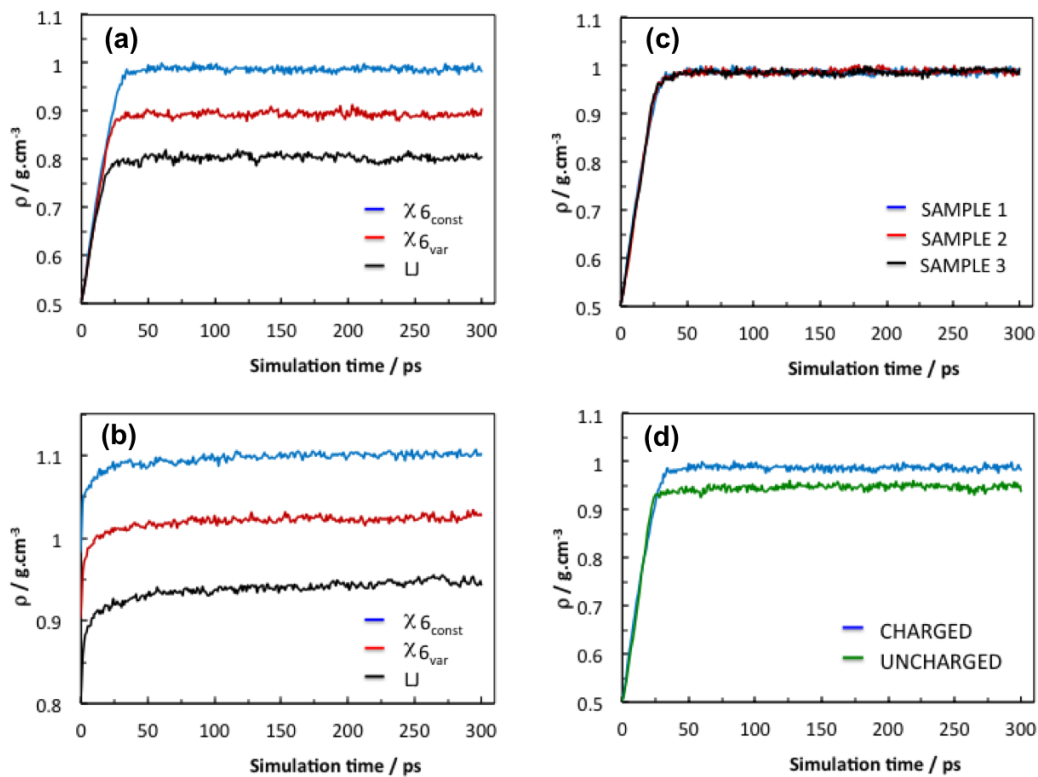

**Figure S6:** Density of the liquid precursor mixture at (a) 500 K and 1 atm (b) 300 K and 1 atm. Densities at (c) 500 K and 1 atm for three independently-generated samples. (d) Densities of systems with and without partial atomic charges at 500 K and 1 atm.

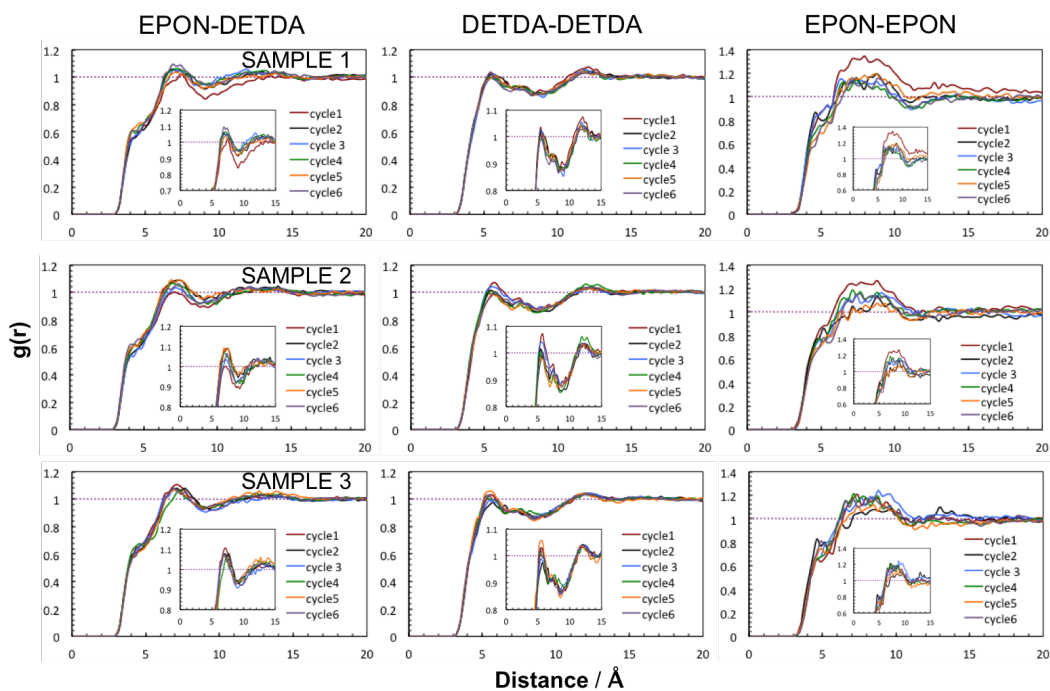

**Figure S7:** Evolution of the RDFs calculated for the liquid precursor mixture at 500 K, as a function of the six simulated annealing cycles: from left to right show the RDFs between EPON-DETDA, DETDA-DETDA and EPON-EPON, for our three independently-generated samples.

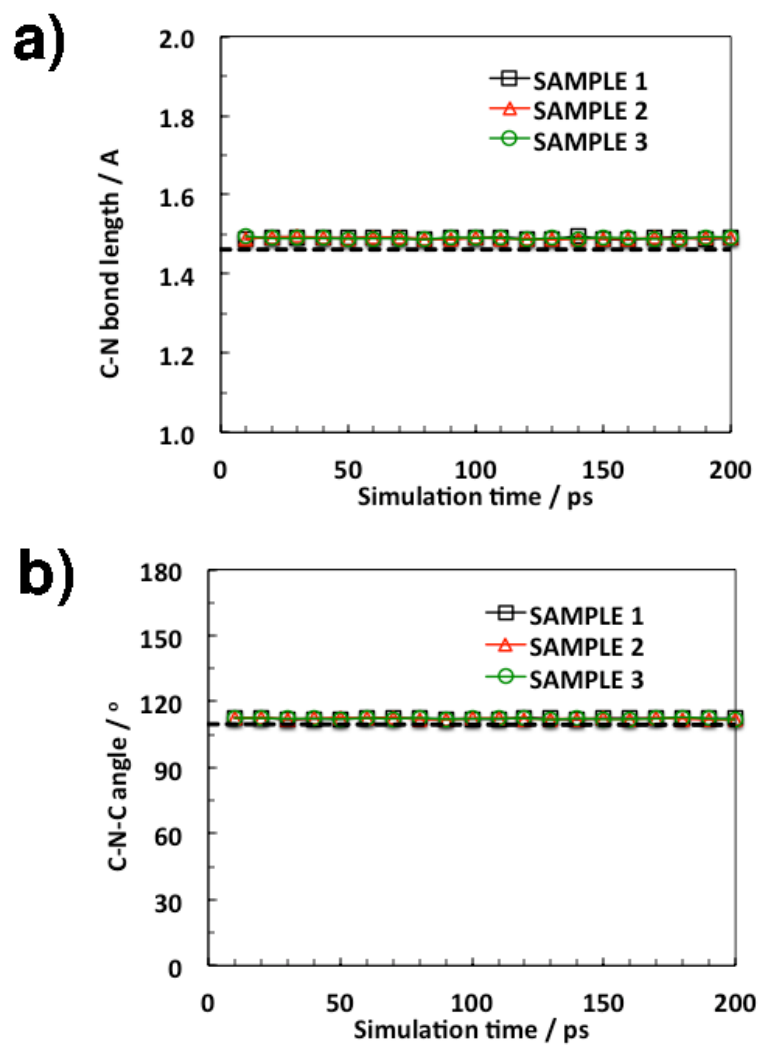

**Figure S8:** (a) Bond lengths of the epoxy polymer cross-link bonds, and (b) bond angles between the C-N-C atoms of the cross-link bonds for the relaxed cross-linked samples at 78% degree of cross-linking.

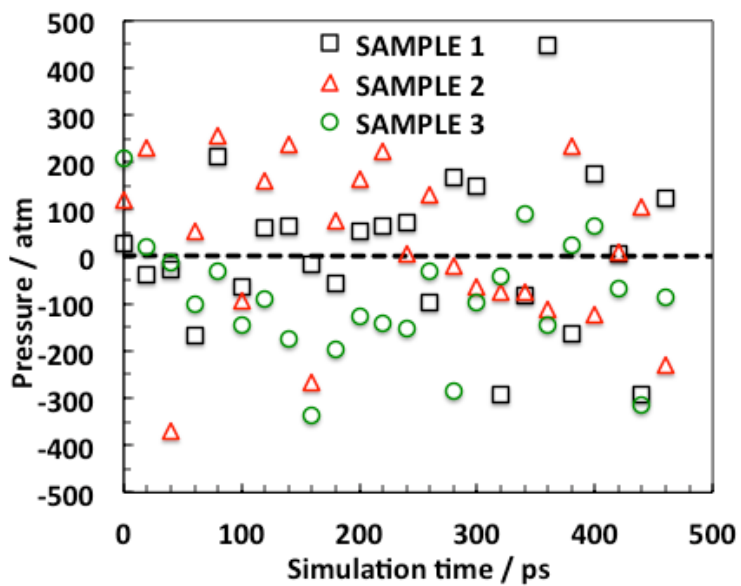

**Figure S9:** Calculated pressure of the sample after the cross-linking process. Dashed line indicates the target pressure, 1 *atm*.

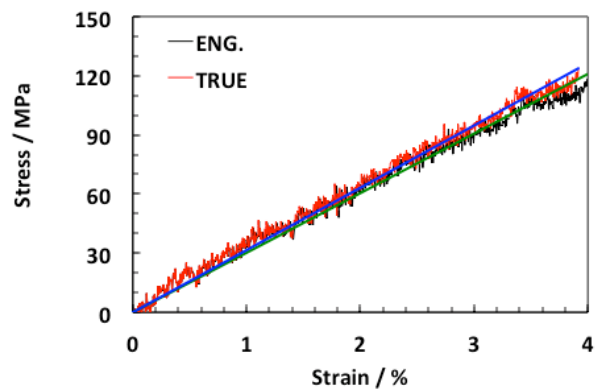

**Figure S10:** Predicted mechanical properties of the epoxy polymer with a 78% cross-linking degree showing Young's modulus plot.



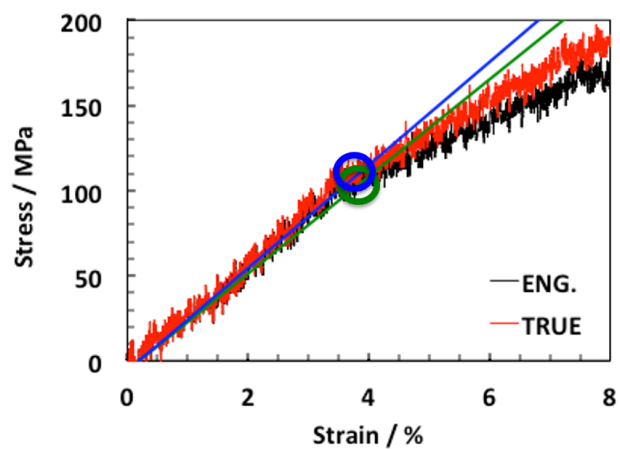

**Figure S11:** Predicted mechanical properties of the epoxy polymer with a 78% cross-linking degree showing yield strength and yield strain calculated via the 0.2% offset line.

## References

- [1] C. Li and A. Strachan, *Polymer*, 2010, **51**, 6058 – 6070.
- [2] M. Hanwell, D. Curtis, D. Lonie, T. Vandermeersch, E. Zurek and G. Hutchison, *J. Cheminform.*, 2012, **4**, 17.
- [3] J. Wang, R. M. Wolf, J. W. Caldwell, P. A. Kollman and D. A. Case, *J. Comput. Chem.*, 2004, **25**, 1157–1174.
- [4] L. Martínez, R. Andrade, E. G. Birgin and J. M. Martínez, *J. Comput. Chem.*, 2009, **30**, 2157–2164.
- [5] D. Chakraborty, S. Dasgupta, W. Goddard, A. Strachan and A. van Duin, *Phys. Rev. Lett.*, 2003, **91**, 98301.
- [6] A. Strachan, E. M. Kober, A. C. T. van Duin, J. Oxgaard and W. A. Goddard, *J. Chem. Phys.*, 2005, **122**, 054502.
- [7] L. Zhang, A. C. T. van Duin, S. V. Zybin and W. A. Goddard, *J. Phys. Chem. B*, 2009, **113**, 10770–10778.
- [8] L. Zhang, S. V. Zybin, A. C. T. van Duin, S. Dasgupta, W. A. Goddard and E. M. Kober, *J. Phys. Chem. A*, 2009, **113**, 10619–10640.
- [9] S. L. Mayo, B. D. Olafson and W. A. Goddard, *J. Phys. Chem*, 1990, **94**, 8897–8909.
